# Supplementary material for: Coupling Additive Manufacturing with Hot Melt Extrusion Technologies to Validate a Ventilator-Associated Pneumonia Mouse Model
Source: MDPI journal article supplement (doi:10.3390/pharmaceutics13060772), 2021-05-21
Supplement: s1 [file s1]

# Supplementary Materials: Coupling Additive Manufacturing with Hot Melt Extrusion Technologies to Validate a Ventilator-Associated Pneumonia Mouse Model

Bahaa Shaqour, Juliana Aizawa, Clara Guarch-Pérez, Żaneta Górecka, Lars Christophersen, Wim Martinet, Emilia Choińska, Martijn Riool, Bart Verleije, Koen Beyers, Claus Moser, Wojciech Świąszkowski, Sebastian A. J. Zaat and Paul Cos

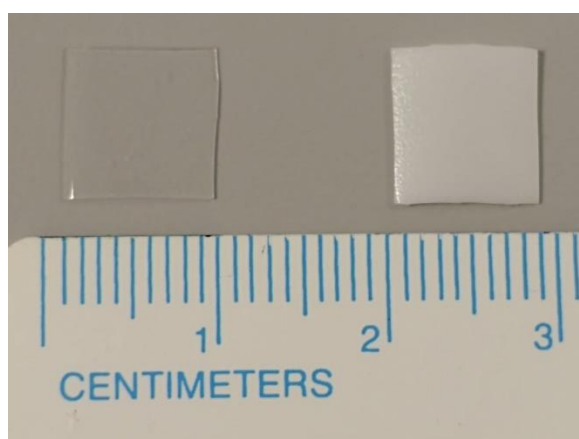

**Figure S1.** Produced TPU and CPX-TPU films after solvent casting.

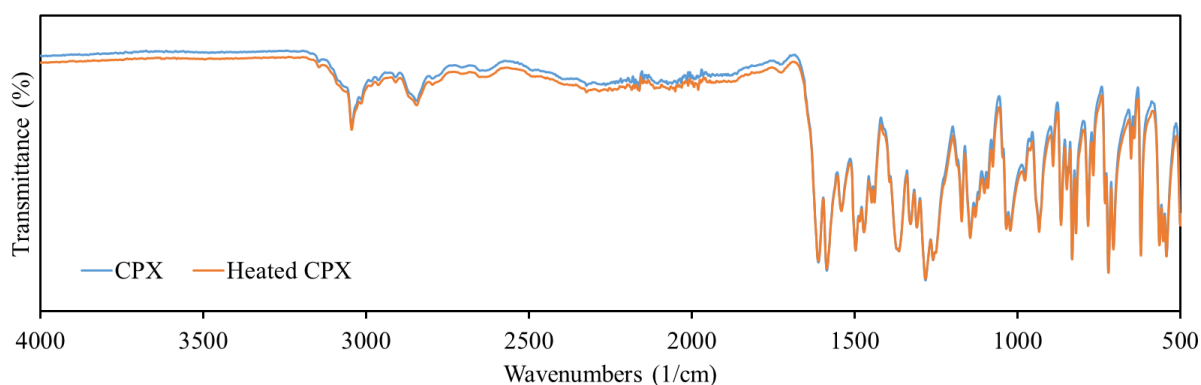

**Figure S2.** FTIR spectra of CPX as received (blue line) and heated for 5 min at 180 °C (orange line).

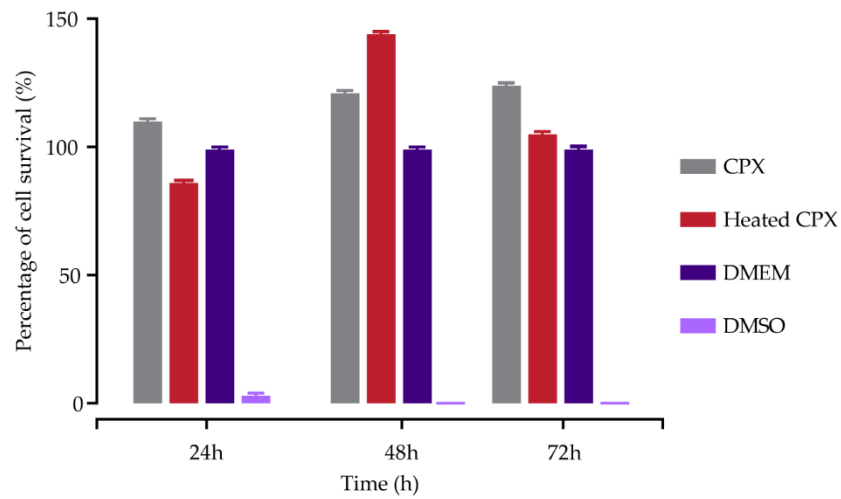

**Figure S3.** Percentage of L929 mouse fibroblast cell survival assay used to confirm that the heated CPX at 180 °C is not cytotoxic at 24, 48 and 72 h. Note: DMEM medium is the positive control and it is set at 100 % cell survival and 10 % DMSO is the negative control ( $n = 6$ ).
